1 Novel prosthecate bacteria from the candidate phylum  
2 Acetothermia revealed by culture-independent genomics and  
3 advanced microscopy

4 **Authors:** Li-Ping Hao<sup>1</sup>, Simon Jon McIlroy<sup>1</sup>, Rasmus Hansen Kirkegaard<sup>1</sup>, Søren  
5 Michael Karst<sup>1</sup>, Warnakulasuriya Eustace Yrosh Fernando<sup>1</sup>, Hüsnu Aslan<sup>2</sup>, Rikke  
6 Meyer<sup>2</sup>, Mads Albertsen<sup>1</sup>, Per Halkjær Nielsen<sup>1\*</sup>, Morten Simonsen Dueholm<sup>1\*</sup>

7 **Affiliation:**

8 <sup>1</sup>Center for Microbial Communities, Department of Chemistry and Bioscience, Aalborg  
9 University, Aalborg, Denmark.

10 <sup>2</sup>Interdisciplinary Nanoscience Center, Aarhus University, Aarhus, Denmark

11 \*Correspondence to: Morten Simonsen Dueholm or Per Halkjær Nielsen, Center for  
12 Microbial Communities, Department of Chemistry and Bioscience, Aalborg University,  
13 Fredrik Bajers Vej 7H, 9220 Aalborg, Denmark; Phone: (+45) 9940 8503; Fax: Not  
14 available; E-mail: [md@bio.aau.dk](mailto:md@bio.aau.dk) or [phn@bio.aau.dk](mailto:phn@bio.aau.dk)

15

16 **Running title:**

17 Novel prosthecate bacteria belonging to the candidate phylum Acetothermia

18 **Subject category:**

19 Integrated genomics and post-genomics approaches in microbial ecology

20 **Abstract**

21 Members of the candidate phylum Acetothermia are globally distributed and detected in  
22 various habitats. However, little is known about their physiology and ecological  
23 importance. In this study, an OTU belonging to Acetothermia was detected at high  
24 abundance in two full-scale anaerobic digesters. The first closed genome from this phylum  
25 was obtained by differential coverage binning of metagenomes and scaffolding with  
26 nanopore data. Genome annotation and metabolic reconstruction suggested an anaerobic  
27 chemoheterotrophic lifestyle in which the bacterium obtain energy and carbon via  
28 fermentation of peptides, amino acids, and simple sugars to acetate, formate, and hydrogen.  
29 The morphology was unusual and composed of a central rod-shaped cell with bipolar  
30 prosthecae as revealed by fluorescence *in situ* hybridization combined with confocal laser  
31 scanning microscopy, Raman microspectroscopy and atomic force microscopy. We  
32 hypothesize that these prosthecae allow for increased nutrient uptake by greatly expanding  
33 the cell surface area, providing a competitive advantage under nutrient-limited conditions.

34 **Main body:**

35 Life, as we know it, would not be possible without microbes. They catalyse key reactions  
36 in all of the major biogeochemical nutrient cycles<sup>1</sup> and are being harnessed for their ability  
37 to convert waste products into renewable resources<sup>2</sup>. They are also essential for our health,  
38 both as beneficial members of our microbiome<sup>3</sup> and as pathogens causing infections<sup>4</sup>.  
39 Knowledge of how distinct microorganisms fit into these processes is required to better  
40 predict the consequences of environmental changes and improve our health as well as the  
41 efficacy of biotechnological processes.

42 Culture-independent surveys of bacterial communities based on amplicon  
43 sequencing of 16S rRNA genes or concatenated single-copy phylogenetic marker genes  
44 have revolutionised our understanding of microbial community dynamics and diversity<sup>2,5-</sup>  
45 <sup>7</sup>. However, such analyses also reveal that many bacterial lineages lack cultivated  
46 representatives, and the bacteria affiliated to these candidate lineages are often poorly  
47 described<sup>6,8,9</sup>. These uncharted branches of the tree of life contain valuable information  
48 about the evolution of bacteria, exciting novel metabolic pathways, and hitherto unknown  
49 functions in microbial communities<sup>6,10-13</sup>.

50 The fast developments in next-generation sequencing and metagenomics enable the  
51 characterization of the whole community gene pool and can be used to elucidate the  
52 functional potential of individual microbial members. This allows us to better understand  
53 the ecological roles and interactions of the ubiquitous uncultivated microorganisms<sup>14-17</sup>.  
54 Genomes of uncultured microorganisms can be recovered from deeply sequenced  
55 metagenomes using different methodologies, such as the differential coverage binning  
56 approach<sup>14</sup>. Such attempts have been made to establish metabolic models and predict the

57 ecophysiology of several candidate bacteria, such as *Candidatus* Fermentibacter daniensis  
58 (candidate phylum Hyd24-12)<sup>18</sup>, OP9/JS1 (candidate phylum Atribacteria)<sup>19</sup> and  
59 *Candidatus* Promineofilum breve (phylum Chloroflexi)<sup>20</sup>.

60 In one of our studies of anaerobic sludge digesters<sup>18</sup>, a metagenome assembled  
61 genome (MAG) classified to the candidate phylum Acetothermia (former OP1)<sup>8</sup> was found  
62 to be present in high abundance. The first draft MAG from this phylum was obtained from  
63 a subsurface microbial mat in the hot water stream<sup>21</sup>. It was predicted to possess a folate-  
64 dependent acetyl-CoA pathway of CO<sub>2</sub> fixation and have an acetogenic lifestyle.  
65 Accordingly, it was given the name *Candidatus* Acetothermum autotrophicum. Another  
66 MAG (Acetothermia bacterium 64\_32) was extracted from a marine shelf siliciclastic  
67 sandstone deposit from an oil reservoir<sup>12</sup>. This draft genome, however, lacked essential  
68 genes encoding for autotrophic CO<sub>2</sub> fixation pathways, indicating a heterotrophic lifestyle.  
69 Other physiological information about this candidate phylum is currently not available.

70 Acetothermia bacteria occupy diverse habitats and have been detected in several  
71 geographically separated anaerobic digesters (**Figure S1**), suggesting that some members  
72 of this phylum may be specifically suited for this environmental niche and play a role in  
73 the conversion of organic matter into biogas. This motivated us to conduct a detailed  
74 investigation into the phylogeny, morphology, physiology, and ecology of Acetothermia  
75 bacteria in anaerobic digesters using amplicon sequencing, metagenomics, and advanced  
76 visualization techniques. This allows us, for the first time, to reveal an unusual morphology  
77 and physiology of this unrecognized microbial player in anaerobic digesters.

## 78 **Materials and methods:**

### 79 **Sample collection and storage**

80 Between one and ten biomass samples were obtained from each of 31 anaerobic digesters  
81 treating primary and surplus sludge at 18 Danish wastewater treatment plants (WWTPs) in  
82 the period from 2011 to 2017 (**Table S1, S2**). A volume of 50 mL digester biomass was  
83 sampled, homogenized, and stored as 2 mL aliquots at  $-80^{\circ}\text{C}$  before DNA extraction. DNA  
84 was extracted using the FastDNA Spin kit for soil (MP Biomedicals, Santa Ana, CA, USA)  
85 as optimized for anaerobic digesters by Kirkegaard *et al.*<sup>18</sup>.

### 86 **Amplicon sequencing of the 16S rRNA gene**

87 The V4 variable region of the bacterial and archaeal 16S rRNA gene was amplified with  
88 the PCR primers 515F<sup>22</sup> (3'-GTGCCAGCMGCCGCGGTAA) and m806R (3'-  
89 GGACTACNVGGGTWTCTAAT) and sequenced using the Illumina platform as  
90 described by Albertsen *et al.*<sup>23</sup>. The m806R primer is a modified version of 806R<sup>22</sup>, in  
91 which the degeneracy of a single base is increased to ensure a perfect match to all  
92 Acetothermia sequences in the SILVA SSU Ref NR 99 database (Release 128)<sup>24</sup>.

93 Amplicon sequencing libraries (**Table S2**) were pooled in equimolar concentrations  
94 with a final loading concentration of 10 pM and sequenced on the MiSeq (Illumina)  
95 platform using a MiSeq reagent kit v3 ( $2 \times 300$  bp).

96 All sequenced sample libraries were trimmed, and low quality reads were removed  
97 using trimmomatic v. 0.32<sup>25</sup> and then merged using FLASH v. 1.2.11<sup>26</sup>. The reads were  
98 screened for potential PhiX contamination using USEARCH v. 7.0.1090<sup>27</sup>. The reads were  
99 clustered into operational taxonomic units (OTUs, sequence identity  $\geq 97\%$ ) using

100 USEARCH and subsequently classified using the RDP classifier<sup>28</sup> with the MiDAS  
101 database v. 1.23<sup>2</sup>. Further analyses were performed in R environment v. 3.4.1<sup>29</sup> using the  
102 R CRAN packages ampvis v. 1.24<sup>23</sup> and ggplot2 v. 1.0.1<sup>30</sup>. The samples were subsampled  
103 to an even depth of 10,000 reads per sample.

#### 104 **Illumina sequencing, metagenome assembly, and genome binning**

105 Illumina Nextera DNA Library Prep kit was used to prepare metagenome libraries  
106 following the standard protocol. DNA extracts from four samples collected at different  
107 time points during the first half of 2016 from a mesophilic digester at Randers WWTP were  
108 used as templates for library preparation (**Table S3**). The libraries were paired-end (2 x  
109 250 bp) sequenced on the Illumina HiSeq 2500 platform using the HiSeq Rapid PE cluster  
110 kit v2 and the HiSeq Rapid SBS kit v2 (500 cycles) in rapid run mode and also paired-end  
111 sequenced (2 x 300 bp) on Illumina MiSeq platform using MiSeq reagent v3 (600 cycles).  
112 Standard protocols were used for sample preparation and sequencing. The metagenomic  
113 assembly and binning process was performed as described by Kirkegaard *et al.*<sup>18</sup>.

#### 114 **Nanopore sequencing**

115 Genomic DNA was prepared for 1D nanopore sequencing (Oxford Nanopore  
116 Technologies, UK), following the manufacturer's protocol (LSK-108) without the optional  
117 DNA shearing and DNA repair steps. The library was loaded on a FLO-MIN106 flow cell  
118 and sequenced using the MinION Mk1B DNA sequencer (Oxford Nanopore  
119 Technologies). The sequencing software used was MinKNOW v. 1.7.3 (Oxford Nanopore  
120 Technologies, UK) with the 48-hour sequencing workflow  
121 (NC\_48Hr\_Sequencing\_Run\_FLO\_MIN106\_SQK-LSK108.py). Sequencing reads were  
122 base-called using Albacore v. 1.2.1 (Oxford Nanopore Technologies, UK).

## 123 **Genome closing and annotation**

124 The SSPACE-LongRead scaffolder v. 1.1<sup>31</sup> was used to assemble contigs from the  
125 Acetothermia genome bin into a single scaffold based on the long Nanopore reads. Gaps  
126 in the draft genome were closed using GapFiller v. 1.1<sup>32</sup> or by manual read mapping and  
127 extension in CLC Genomics Workbench v. 9.5.2. Finally, the closed genome was manually  
128 polished to remove SNPs and ensure a high quality assembly (**Table S4**). Genome  
129 annotation was performed in the ‘MicroScope’ annotation pipeline<sup>33,34</sup> as described by  
130 Kirkegaard *et al.*<sup>18</sup>.

## 131 **Phylogeny of the 16S rRNA gene and FISH probe design**

132 Phylogenetic analysis and FISH probe design were performed using the ARB software  
133 package<sup>35</sup> with the SILVA SSURef NR 99 database (Release 128)<sup>24</sup>. All sequences  
134 classified to the Acetothermia phylum from the SSURef database were included, except  
135 those from the same study that shared  $\geq 99\%$  similarity. Potential probes were assessed *in*  
136 *silico* with the mathFISH software<sup>36</sup>. The Ribosomal Database Project (RDP) PROBE  
137 MATCH function<sup>37</sup> was used to identify non-target sequences with indels<sup>38</sup>. Probe  
138 validation and optimization were based on generated formamide dissociation curves, as  
139 described by Daims *et al.*<sup>39</sup>. The final probes are shown in **Table S5** and have been  
140 deposited in the probeBase database<sup>40</sup>.

## 141 **Sample fixation and fluorescence *in situ* hybridization (FISH)**

142 Fresh biomass samples, taken from sludge digesters at Randers and Esbjerg WWTPs, were  
143 treated by either ethanol or paraformaldehyde (PFA) for the optimal fixation of Gram-  
144 positive and Gram-negative bacteria, respectively. For PFA fixation, diluted samples [1:4

145 in 1 x Phosphate-Buffered Saline (PBS) solution] were first fixed with 4% (w/v) PFA and  
146 then stored in 50% (v/v) ethanol / 1 x PBS solution at  $-20^{\circ}\text{C}$ , as previously described<sup>39</sup>.  
147 For ethanol fixation, pellets were first obtained by removing the supernatant by  
148 centrifugation at 12,000 g for 5 min at  $4^{\circ}\text{C}$ , and then directly fixed and stored in 50% (v/v)  
149 ethanol / 1 x PBS solution.

150 FISH was performed as detailed by Daims *et al.*<sup>39</sup>. The hybridization conditions  
151 applied for each probe are given in **Table S5**. The NON-EUB probe was applied as a  
152 negative control for hybridization<sup>41</sup>. Nucleic acids in cells were stained with either 4',6-  
153 diamidino-2-phenylindole (DAPI) (50  $\mu\text{M}$ , for 30 min) or Syto9 (6  $\mu\text{M}$ , for 20 min)  
154 (Molecular Probes, Eugene, Oregon, USA). Microscopic analysis was performed with an  
155 Axioskop epifluorescence microscope (Carl Zeiss, Oberkochen, Germany) or a white light  
156 laser confocal microscope (Leica TCS SP8 X) fitted with a 405 nm diode laser (Leica  
157 Microsystems, Kista, Sweden). Excitation (Ex.) and emission (Em.) details applied are as  
158 follows: DAPI (Ex. 405 nm; Em. 440-615 nm); Syto9 (Ex. 485 nm; Em. 490-550 nm);  
159 FLUOS (Ex. 492 nm; Em. 500-555 nm); Cy3 (Ex. 554 nm; Em. 565-650 nm); Cy5 (Ex.  
160 649 nm; Em. 660-695 nm).

## 161 **Raman spectroscopy**

162 To locate the Acetothermia cells for Raman analysis, FISH was conducted on optically  
163 polished  $\text{CaF}_2$  Raman windows (Crystran, UK) by using the newly designed OP1 probes  
164 labelled with Cy3. Once the cells were located, the fluorescence of Cy3 was bleached by  
165 keeping the Raman laser on the target cell for 5 min. Raman spectra from single cells of  
166 Acetothermia were obtained using a Horiba LabRam HR 800 Evolution (Jobin Yvon –  
167 France) equipped with a Torus MPC 3000 (UK) 532 nm 341 mW solid-state semiconductor



168 laser. Prior to all measurements, the Raman microspectrometer was calibrated to the first  
169 order Raman signal of Silicon occurring at  $520.7\text{ cm}^{-1}$ . The  $\text{CaF}_2$  Raman substrate also  
170 contains a single sharp Raman marker at  $321\text{ cm}^{-1}$ , which serves as an internal reference  
171 point in every spectrum. The incident laser power density on the sample was attenuated  
172 down to  $2.1\text{ mW}/\mu\text{m}^2$  using a set of neutral density (ND) filters.

173 The Raman system is equipped with an in-built Olympus (model BX-41)  
174 fluorescence microscope. A 50x, 0.75 numerical aperture dry objective (Olympus M Plan  
175 Achromat- Japan), with a working distance of 0.38 mm was used throughout the work. A  
176 diffraction grating of 600 mm/groove was used, and the Raman spectra collected spanned  
177 the wavenumber region of  $200\text{ cm}^{-1}$  to  $1800\text{ cm}^{-1}$ . The slit width of the Raman spectrometer  
178 and the confocal pinhole diameter were set to  $100\text{ }\mu\text{m}$  and  $150\text{ }\mu\text{m}$ , respectively. Raman  
179 microspectrometer operation and subsequent processing of spectra were conducted using  
180 LabSpec version 6.4 software (Horiba Scientific, France).

### 181 **Atomic force microscopy (AFM)**

182 The combined optical and atomic force microscopy experiments were carried out with a  
183 sample stained with  $10\text{ }\mu\text{M}$  Syto9 in PBS solution. A JPK Nanowizard IV system (Berlin,  
184 Germany) on an inverted Zeiss Axiovert 200M epifluorescence microscope was used, with  
185 a 63x oil immersion optical lens (Zess Plan-Apochromat, NA 1.4) and Zeiss filter set 10  
186 (Ex. 450-490 nm, Em. 525-565 nm). This AFM setup was used in the QI™ mode, which  
187 is a dynamic nanomechanical mapping (DNM) method. This DNM method can  
188 simultaneously provide height channels for morphology, and force spectroscopy based  
189 information, i.e. adhesion channel and force-distance curves. Although DNM methods are  
190 often used for accessing mechanical and physicochemical properties of the sample, they

191 are also employed for high-resolution imaging due to their capability to directly control the  
192 tip-sample interaction forces below nanoNewton level. In this work, DNM was employed  
193 for advanced imaging, and the scans were acquired with a soft cantilever, namely  
194 Scanasyst-Air (Bruker). Nominal values for the cantilever's resonance frequency and the  
195 spring constant are 70 kHz and 0.4 N/m, respectively. The operation parameters such as  
196 set point and Z length were varied to optimize the scan for the highest resolution and to  
197 minimize the risk of damaging the tip and the sample. The pixel time was kept at 30 ms. Z  
198 range was set to 15  $\mu\text{m}$ , and the images were initially acquired with 256 $\times$ 256 px, then with  
199 512 $\times$ 512 px, if possible. All DNM experiments were carried out in air under room  
200 conditions.

#### 201 **Data availability**

202 All sequencing data has been submitted to the ENA under the project ID PRJEB22104.  
203 Amplicon sequencing data is available with the accession numbers ERS1910092-  
204 ERS1910183, metagenome data with the accession numbers ERS1909451-ERS1909457,  
205 and the complete genome under accession number ERZ478283.

206 **Results and discussion:**

207 Acetothermia bacteria have previously been observed in anaerobic digesters<sup>42</sup>, but their  
208 distribution and abundance in these systems are not known. It was therefore decided to  
209 survey the microbial composition of 31 full-scale anaerobic digesters using 16S rRNA gene  
210 amplicon sequencing. The choice of PCR primers can have a pronounced bias on the  
211 microbial composition observed<sup>23</sup>. Three common 16S rRNA gene amplicon primer pairs  
212 were evaluated on samples from a digester containing Acetothermia, and metagenomes of  
213 the same samples derived from primer-independent shotgun sequencing were used as  
214 references (**Figure S2**). Only the 515F/806R<sup>22</sup> primer pair, which targets V4 region of the  
215 16S rRNA gene, was able to amplify Acetothermia-related 16S rRNA genes and provide  
216 an estimate of Acetothermia relative abundance in the samples. To ensure that the primer  
217 pair would be able to target all Acetothermia, we compared the primer sequences to  
218 Acetothermia sequences in the SILVA databases. It was found that 67.4% of the sequences  
219 contained a single mismatch to the 806R primer. However, this could be alleviated by  
220 increasing the degeneracy of the primer at a single position. This modification did not affect  
221 the overall community structure of the samples tested, so the modified primer was used for  
222 the survey.

223         Only a single genus-level OTU assigned to phylum Acetothermia was observed in  
224 four mesophilic sludge digesters at two WWTPs from the survey of 31 digesters (**Figure**  
225 **1A**). The OTU was stably present over a period of three to six years in these digesters, but  
226 displayed a notable decline from the summer of 2016. It ranked among the five most  
227 abundant bacterial OTUs and constituted from 0.1 to 8.9% of all sequenced 16S rRNA  
228 gene amplicons (**Figure 1B**). The Acetothermia OTU was not detected in amplicons of the

229 incoming feed streams (primary and surplus biological sludge from the wastewater  
230 treatment processes), which indicates that the abundance observed was due to growth in  
231 the digesters and not immigration. No OTUs related to Acetothermia were observed in  
232 thermophilic digesters, or the mesophilic digester operated with thermal hydrolysis of  
233 feedstock (**Figure 1A**). This indicates that the Acetothermia OTU has special habitat  
234 requirements specific to some mesophilic systems that treat primary and surplus biological  
235 sludge.

### 236 **Complete genome of the Acetothermia bacterium**

237 To learn more about the ecophysiology of Acetothermia bacteria in anaerobic digesters,  
238 we sought to obtain genomic information from the abundant OTU. This organism was  
239 consistently found in high abundance in a full-scale anaerobic sludge digester at Randers  
240 WWTP, thus providing a good system for in-depth investigations (**Figure 1B**). To this end,  
241 metagenomes were constructed from four individual biomass samples collected during the  
242 first half of 2016 (**Table S3**) and a 12-contig draft genome of Acetothermia bacterium sp.  
243 Ran1 ('Ran1' in short) was successfully binned from these using differential coverage  
244 binning<sup>14</sup> (**Figure S3**). Long read Nanopore data was obtained from one of the four samples  
245 and used to scaffold the draft genome and create a complete closed genome after manual  
246 polishing (**Table S4**).

247 The closed genome was 1.32 Mbp and had a GC content of 68.2%. The genome  
248 encodes a single split rRNA operon, in which the 16S rRNA gene was located away from  
249 the co-localized 23S and 5S rRNA genes. Fewer rRNA gene copies, as well as more split  
250 rRNA operons, are common features in host-dependent bacteria, but less frequent in free-  
251 living cells<sup>43</sup>. Accordingly, Ran1 could be a host-dependent organism, but microscopy

252 revealed that this was not the case for Ran1 (see below). Instead, we hypothesize that the  
253 anaerobic digester may provide a stable environmental niche for the bacterium, similar to  
254 that provided by a host cell.

### 255 **Phylogenetic analyses of Ran1**

256 Ran1 was classified to the Acetothermia based on its 16S rRNA gene using the SILVA  
257 taxonomy. Phylogenetic analyses of the available sequences for this phylum revealed  
258 evident separation of lineages with similar ecological preferences and habitats (**Figure 2A**,  
259 **Figure S4**). The 16S rRNA gene sequence of Ran1 clustered into a mono-phylogenetic  
260 group together with sequences from other anaerobic digesters<sup>42,44–47</sup>. Based on the  
261 recommended sequence similarity cut-off values for the definition of phylogenetic taxa<sup>48</sup>,  
262 this group represents a new genus, within the same family as the uncultured Acetothermia  
263 bacterium 64\_32<sup>12</sup>. A phylogenetic tree based on concatenated single copy marker gene  
264 was created and used to establish a broader phylogenetic context (**Figure 3**). This revealed  
265 that Ran1 and the previous Acetothermia draft genomes<sup>12,21</sup> are distantly related to all  
266 currently available genomes, supporting its status as a novel phylum.

### 267 **Morphology**

268 To investigate the morphology of Ran1, we designed two FISH probes that cover the  
269 proposed novel genus that contains Acetothermia bacteria associated with anaerobic  
270 digesters (**Figure 2A**). These probes were then applied to samples from one of the digesters  
271 at Randers WWTP (**Figures 2B, S5, and S6**). Both PFA- and ethanol-fixed samples were  
272 analyzed to ensure optimal fixation of Gram-positive and Gram-negative bacteria,  
273 respectively (**Figure S6**). FISH results revealed small rod-shaped cells (approx. 0.8 x 1~2  
274  $\mu\text{m}$ ) dispersed in the liquid phase, which were hybridized with the genus-specific probes.

275 With ethanol-fixed biomass, appendages (approx. 0.4 x 4~8  $\mu\text{m}$ ) were observed at both  
276 poles of the rod-shaped cell. FISH signals for these structures were patchy, indicating a  
277 relatively low number of ribosomes present inside the appendages. No FISH signal were  
278 observed for the appendages with PFA fixed cells (**Figure S6**). When using Syto9 to stain  
279 the nucleic acids, these appendages were clearly visualized for the probe-hybridized cells  
280 in both PFA- and ethanol-fixed samples (**Figure S6**). It suggests that the nucleic acid  
281 containing cytoplasm was shared between the rod-shaped “main body” and the  
282 appendages. This was further confirmed by Raman microspectroscopy analysis, which  
283 demonstrated a similar composition in terms of nucleic acids, membrane lipids, and  
284 proteins of the main body and the appendages (**Figure 2C**). Probe-targeted cells from  
285 another digester at Esbjerg WWTP demonstrated similar morphology. Accordingly, we  
286 hypothesize that the appendages are extensions of the cell envelope out of the central rod  
287 body, similar to the prosthecae of *Caulobacter* and *Asticcacaulis*<sup>49</sup>.

288 Further analysis of FISH data demonstrated three different morphologies according  
289 to the size of the central rod and the length or appearance of the polar prosthecae: 1) central  
290 rod with bipolar prosthecae of similar length; 2) smaller central rod with bipolar stalks of  
291 different length; 3) smallest central rod with a single polar prostheca (**Figure 2B**). These  
292 different morphologies likely represent sequential development of bacterial morphology at  
293 different growth stages, in which small rods with a single prostheca represent cells just  
294 after cell division, and the longer rods with two prosthecae of equal length represent cells  
295 just before cell division. Indeed, it was possible to identify a few dividing cells with  
296 prosthecae of equal length (**Figure 2B**). Dynamic morphology change in a cell cycle is  
297 already known from other prosthecate bacteria, such as *Caulobacter*<sup>53</sup> and *Asticcacaulis*<sup>54</sup>.

298 Higher resolution information on cell surface properties of Ran1 was obtained using  
299 atomic force microscopy (AFM) (**Figure 4**). AFM confirmed the morphology observed by  
300 FISH microscopy, i.e. a central rod-shaped cell with prosthecae extending from both poles.  
301 Analysis of four individual Ran1 cells revealed that the average width and length of the  
302 main rod body were  $0.46\pm 0.03\ \mu\text{m}$  and  $1.58\pm 0.39\ \mu\text{m}$ , respectively. The average height of  
303 only  $0.066\pm 0.017\ \mu\text{m}$  showed that cells collapsed during air drying of the sample. The  
304 width of the prosthecae was relatively constant ( $0.256\pm 0.004\ \mu\text{m}$ ), but decreased to  
305  $0.225\pm 0.001\ \mu\text{m}$  in cross sections where bending of the prosthecae occurred. Such bendings  
306 were observed in most samples, and the degree of narrowing varied, based on the bending  
307 angle, which was up to  $124.2\pm 3.6^\circ$ . This indicated flexibility of the prosthecae. The total  
308 length of the bacteria with prosthecae was  $11.42\pm 1.49\ \mu\text{m}$ .

309 The total surface area (SA) and surface area to volume ratio (SA/V) were calculated  
310 for the rod-shaped cell with and without the prosthecae, based on the observed average  
311 length and width. Results show that development of the prosthecae made the surface area  
312 increase by 3.5 times (from  $2.28$  to  $10.20\ \mu\text{m}^2$ ) and SA/V become 42% larger (from  $9.6$  to  
313  $13.7\ \mu\text{m}^{-1}$ ), providing an increased interface for nutrients uptake<sup>50-52</sup>. It has been  
314 demonstrated that prosthecate bacteria have a competitive advantage under nutrient  
315 deficient conditions, and they are often observed under such conditions<sup>51-54</sup>. Nevertheless,  
316 this effect is even more pronounced in diffusion-limited environments, where the rate of  
317 nutrient uptake is proportional to the effective linear dimension of a structure, rather than  
318 to its surface area<sup>51</sup>. Indeed, the length of the prostheca of *Caulobacter* inversely correlates  
319 with the availability of phosphate, indicating enhanced phosphate uptake capability<sup>55</sup>.  
320 Consistent with this observation, the digesters which harbour Ran1 in abundance

321 demonstrated relatively low soluble orthophosphate concentration (around 25~80 mg  
322  $\text{PO}_4^- \text{P/L}$ ), compared to the other digesters (95~480 mg  $\text{PO}_4^- \text{P/L}$ ) (**Table S1**).  
323 Furthermore, it was observed that the decrease of Ran1 (from 6~8% to < 1%) in the summer  
324 of 2016 followed an increase of phosphorus content ( $\text{PO}_4^- \text{P}$  and Total P) as well as  
325 concentration of organic compounds (VFAs, CODs) in the liquid phase (**Figure S7 and**  
326 **S8**). This supports the idea that Ran1 may have a competitive advantage in nutrient-limited  
327 engineered systems, especially at levels with relatively low amounts of phosphorus. Ran1  
328 may, therefore, be used as a bioindicator for such a condition, but more studies are needed  
329 to verify this hypothesis.

### 330 **Genome inferred surface properties**

331 Some cell envelope properties can be inferred directly from genomes, based on the  
332 presence or absence of cell envelope genes found specifically in archetypical mono- or  
333 diderm lineages<sup>14</sup>. This study revealed an unusual cell envelope architecture of Ran1, with  
334 similarities to both members of the monoderm Chloroflexi and the atypical diderms  
335 Thermotoga and Deinococcus-Thermus (**Figure S9**). Accordingly, it is less than easy to  
336 conclude whether Ran1 has a mono- or diderm cell envelope. The genome did not contain  
337 any genes associated with lipopolysaccharides, which are commonly found in the outer  
338 membrane of diderm bacteria<sup>56</sup>. However, genes encoding an outer-membrane-specific  
339 bacterial surface antigen and an outer-membrane permease imply that Ran1 may have a  
340 simple diderm cell envelope similar to those found in Thermotoga<sup>57</sup>. The sheath-like outer  
341 membrane of Thermotoga changes its size according to environmental conditions, which  
342 has been proposed to provide increased access to nutrients in the same manner as the



343 prosthecae of prothecate bacteria<sup>58</sup>. Accordingly, it may be proposed that the outer  
344 membrane of Ran1 is a simple scaffold for high affinity nutrient transporter<sup>51</sup>.

345 Further genome annotation and specialized searches using the PilFind program<sup>59</sup>  
346 did not reveal any genes associated to flagella, fimbriae, pili, or cell surface adhesins.  
347 However, a few genes related specifically to prostheca development were encoded by the  
348 genome, such as the bactofilin family cytoskeletal protein CcmA and the bifunctional  
349 penicillin-binding protein Pbp<sup>53</sup>. In *Caulobacter crescentus*, bactofilins are found as  
350 membrane-associated clusters at the pole of the cell, where they recruit the peptidoglycan  
351 synthase PbpC and initiate prosthecae development<sup>53</sup>. It is, therefore, likely that Ran1  
352 may use a similar strategy for this purpose. Metabolic model for Ran1

353 To learn more about the potential function of Ran1, we constructed a metabolic  
354 model based on the annotated genome (**Figure 5** and **Table S6**). A brief overview of the  
355 metabolic model is provided below, and detailed descriptions of selected pathways are  
356 given in **Supplementary Results**.

### 357 ***Carbon uptake and central metabolism***

358 Several ABC transporter genes were detected, including those for importing amino acids,  
359 peptides, glycerol-3-phosphate, maltose, ribose, and alpha-glucoside. This indicates that  
360 Ran1 can take up these compounds at the expense of ATP or the proton motive force (PMF)  
361 and use them as carbon and energy sources.

362 Sugars imported can be catabolized through the Embden–Meyerhof–Parnas  
363 pathway. The ATP produced during the transformation of hexoses to pyruvate can provide  
364 the cells with energy. Besides hexoses, Ran1 may utilize a broad range of pentoses, as it  
365 has all the genes of the non-oxidative pentose phosphate pathway<sup>60</sup>. Ran1 also encoded the

366 complete pathway for glycogen metabolism and the gene encoding a trehalose synthase.  
367 Therefore, glycogen and trehalose may serve as carbon and energy storage, which can be  
368 utilized to mitigate fluctuations in substrate availability<sup>61,62</sup>. Two extracellular glycosylases  
369 were identified, including a cellulase and a glycoside hydrolase. This indicates that Ran1  
370 has some limited extracellular saccharolytic activity and can hydrolyze polysaccharides  
371 from the feeding sludge into simpler sugars.

372 The pyruvate generated from sugars can be converted to acetyl-CoA by the  
373 pyruvate:ferredoxin oxidoreductase complex (*porABC*), generating reduced ferredoxin  
374 ( $Fd_{red}$ ). Acetyl-CoA can then enter the fermentation pathway catalyzed by two acetyl-CoA  
375 synthetases (*acsA* or *acdA*), resulting in the production of acetate and energy in the form  
376 of ATP.

377 The genome encoded an incomplete tricarboxylic acid (TCA) pathway, in which a  
378 succinate dehydrogenase (*sdhABCD*)/fumarate reductase (*frdABCD*) complex was not  
379 annotated. The partial pathway may serve as a source of biosynthetic precursors for  
380 anabolic pathways, as in methanogens and some other anaerobic bacteria<sup>63,64</sup>.

381 Amino acids and peptides, imported by ABC transporters, represent a potential  
382 source of carbon, nitrogen, energy, and building blocks of the cell. Indeed, it was found  
383 that the genome encoded genes for catabolizing at least 13 of the 22 amino acids (**Figure**  
384 **S10 and S11**). Serine, glycine, cysteine, aspartate, glutamate, glutamine, histidine,  
385 tyrosine, and tryptophan can be deaminated and converted into either pyruvate,  
386 oxaloacetate, or 2-oxoglutarate (**Figure S10**). These intermediates are then further oxidized  
387 by the pyruvate:ferredoxin oxidoreductase (*por*) or 2-ketoglutarate ferredoxin  
388 oxidoreductase (*kor*) to generate acetyl-CoA or succinyl-CoA, which can then be cleaved

389 to yield acetate or succinate and energy in the form of ATP<sup>65,66</sup>. Glycine and serine can  
390 alternatively be degraded to formate through the glycine cleavage system and  
391 tetrahydrofolate pathway<sup>42</sup>, concomitant with the generation of ATP and reducing  
392 equivalents (in the form of NADH and Fd<sub>red</sub>). Some key enzymes involved in the  
393 catabolism of branched-chain amino acids were absent in the annotated genome (**Figure**  
394 **S11**). It is therefore only the non-branched-chained amino acids that can be used as energy  
395 source.

396 Limited capacity for amino acid synthesis was encoded in the genome (**Table S6**),  
397 indicating that some of the imported amino acids need to be directly used in anabolic  
398 pathways<sup>67</sup>.

399 Ran1 does not have the necessary genes for nitrogen fixation and ammonia import.  
400 Amino acids are thus predicted to be a major source of nitrogen, as NH<sub>3</sub> is produced from  
401 deamination and assimilated via the glutamine/glutamate synthase pathway<sup>68</sup>. The high  
402 dependence of exogenous amino acids and the fact that Ran1 only encode a single  
403 extracellular protease imply high dependence on the proteolytic action of other members  
404 of the microbial community.

#### 405 ***Energy conservation and electron flow***

406 Ran1 encodes an energy-conserving, membrane-bounded hydrogenase complex (Mbh A-  
407 N) (**Figure 5 and S12**) which can translocate protons across the membrane while  
408 catalysing Fd<sub>red</sub>-driving H<sub>2</sub> production<sup>19,69</sup>. It enables the cell to establish a PMF from  
409 Fd<sub>red</sub><sup>70</sup>. The produced H<sub>2</sub> and Fd<sub>ox</sub> can be recycled by another complex formed by the  
410 electron-bifurcating heterodisulfide reductase (Hdr A-C) and the methyl viologen reducing  
411 hydrogenase (Mvh D,G,A)<sup>69</sup>. In addition, a bidirectional [NiFe] hydrogenase complex

412 (Hox E,F,U,H,Y) and a putative [Fe] hydrogenase (Hym AB) were also encoded. These  
413 complexes catalyze the electron transfer between  $H^+/H_2$  with  $NAD(P)H/NAD(P)^{+71,72}$  and  
414  $Fd_{red}/Fd_{ox}^{73}$ , respectively. These bidirectional hydrogenases are hypothesized to function  
415 as electron valves, balancing reductants in the cell<sup>72</sup>. As part of the energy recycling  
416 system, the membrane-integral pyrophosphatase (HppA) can also translocate  $H^+$  or  $Na^+$  to  
417 generate PMF, using the energy produced from hydrolysis of pyrophosphate (PPi)<sup>74</sup>.

418 Surprisingly, the genome does not encode any conventional ATP synthases, which  
419 are often used to generate ATP at the expense of the established PMF<sup>75</sup>. Loss of functional  
420 ATP synthase has also been reported for other strictly anaerobic fermenters, such as  
421 *Clostridium acetobutylicum*<sup>76</sup> and *Clostridium perfringens*<sup>77</sup>. The energy stored in the PMF  
422 is therefore most likely used for active transport of substrates<sup>78</sup>.

### 423 ***Sulfur metabolism***

424 Ran1 does not encode pathways for sulphate reduction. However, the complex formed by  
425 the electron-bifurcating heterodisulfide reductase (Hdr A-C) and the methyl viologen  
426 reducing hydrogenase (Mvh D,G,A) could function as a polysulfide/disulfide  
427 oxidoreductase (**Figure S12**), as proposed for other anaerobic bacteria<sup>18,79</sup>. Ran1 may  
428 therefore have a potential role in sulphur transformations in digesters.

### 429 ***Stress response***

430 The genome possesses several genes typical of anaerobic bacteria, such as the oxygen-  
431 sensitive class III ribonucleoside triphosphate reductase, ferredoxin oxidoreductases, and  
432 radical S-adenosyl-methionine-dependent (SAM) proteins (**Table S6**). The oxygen-  
433 required class-I and oxygen-tolerant class-II ribonucleotide triphosphate reductases were  
434 not found. However, Ran1 encodes several proteins predicted to counter oxidative damage,

435 including superoxide reductase, ruberythrin, thioredoxins, peroxidases, thioredoxin  
436 reductase, and glutaredoxins, which may allow it to survive under microaerobic conditions.

#### 437 **Ecological significance and concluding remarks**

438 This study presents the first detailed insight into the morphology, physiology, and ecology  
439 of a member of the candidate phylum Acetothermia (former OP1). The bacterium was  
440 stably present in several mesophilic sludge digesters during a period of several years and  
441 represents a novel genus that includes other previously detected 16S rRNA gene sequences  
442 of Acetothermia in anaerobic bioreactors. Members of this genus from digesters at different  
443 WWTPs belong to the same OTU and demonstrate the same morphology. These digesters,  
444 from two individual WWTPs, have no link between each other in terms of operation,  
445 seeding microbiome and feedstock. It may indicate low diversity of Acetothermia bacteria  
446 in anaerobic digester environments. The metabolic reconstruction suggested that it is an  
447 anaerobic, fermentative bacterium involved in acidogenesis, producing organic acids (such  
448 as acetate and formate) and hydrogen from the fermentation of peptides, amino acids, and  
449 simple sugars (maltose, sucrose). It might also use polysulfide as an alternative electron  
450 acceptor to produce hydrogen sulphide (H<sub>2</sub>S) – thus contributing to the turnover of sulfur  
451 and production of H<sub>2</sub>S.

452         The heterotrophic way of life predicted for Ran1 is similar to that of the oil  
453 reservoir-associated Acetothermia bacterium 64\_32<sup>12</sup>, which affiliates to the same family  
454 level clade (**Figure 2A**). In contrast, the other more distantly related described member of  
455 the phylum, *Candidatus* Acetothermum autotrophicum, is predicted to have an acetogenic  
456 lifestyle by CO<sub>2</sub> fixation<sup>21</sup>.

457           Interestingly, this Acetothermia bacterium demonstrated an unusual morphology  
458 composed of a central rod cell and long prosthecae protruding from both poles of the rod.  
459 This type of morphology is rarely observed for bacteria outside the Alphaproteobacteria<sup>80</sup>,  
460 and it is the first time prosthecae have been shown for a candidate phylum bacterium. The  
461 model organism for prosthecate bacterium, *C. crescentus*, has revealed important insight  
462 into development of cell morphologies<sup>53</sup>. As Ran1 is distantly related to all known  
463 prosthecate bacteria, it is likely that this bacterium can shed new light on the evolution of  
464 cell morphology. The long and flexible prosthecae greatly expand the surface area of the  
465 cell and provide increased access to nutrients under nutrient-limiting conditions. This is  
466 supported by their abundance being restricted to digesters with relatively low levels of  
467 phosphorus and other nutrients.

468           The genome generated in this study is one of few closed genomes for uncultured  
469 candidate phyla and importantly provides the foundation for future study on pathway  
470 expression of the lineage with metatranscriptomics and metaproteomics. The design of  
471 FISH probes for the genus will facilitate future *in situ* studies of the genus in other systems.

472           Phylogenetic analyses of the Ran1 genome classified it as a novel genus within the  
473 phylum. We suggest that the closed genome should serve as the type material for this genus  
474 <sup>81,82</sup> and propose the following taxonomic names for the novel genus and species:

475 *Bipolaricaulis* gen. nov.

476 Etymology. L. pref. *bis bi*, twice; N.L. adj. *polaris* (from L. n. *polus*, a pole), pertaining to  
477 the poles of the rod-shaped cell; L. masc. n. *caulis*, stalk; N.L. masc. n. *Bipolaricaulis*,  
478 stalks at both poles.

479 *Bipolaricaulis anaerobia* gen. et sp. nov.

480 Etymology. an.a.e.ro'bi.a. N. L. F. adj. Gr. pref. an not; Gr. N. aer air; Gr.n.bios life; N.L.  
481 adj. anaerobia, anaerobe, that can live in the absence of oxygen; referring to the respiratory  
482 metabolism of the organism.

### 483 **Acknowledgments:**

484 This study was supported by Innovation Fund Denmark (NomiGas, grant 1305-00018B)  
485 MiDAS, Obelske Family Foundation, Villum Foundation, and Aalborg University. The  
486 AFM equipment and its application by Hüsünü Aslan were partially funded by the Carlsberg  
487 Foundation. We thank Kirsten Nørgaard and Lisbet Adrian for providing samples and  
488 physico-chemical data from the plants. The LABGeM (CEA/IG/Genoscope & CNRS  
489 UMR8030) and the France Génomique National infrastructure (funded as part of  
490 Investissement d'avenir program managed by Agence Nationale pour la Recherche,  
491 contract ANR-10-INBS-09) are acknowledged for support within the MicroScope  
492 annotation platform.

### 493 **Contributions**

494 L.-P.H., P.H.N., M.A. and M.S.D. designed the experiments. L.-P.H., M.S.D., R.H.K., and  
495 S.M.K. contributed to the genome construction. L.-P.H. and M.S.D. are responsible for  
496 genome annotation. S.J.M. designed the FISH probes and performed FISH. H.A. and R.M.  
497 conducted AFM analysis. W.E.Y.F. conducted Raman analysis. L.-P.H. contributed to  
498 sample collection and preparation, physico-chemical analysis, and amplicon sequencing.  
499 L.-P.H. and M.S.D. drafted the manuscript. All authors contributed to discussion and  
500 revision of the paper.

501

### 502 **Conflict of interest:**

503 The authors declare no conflict of interest.



## 504 References

- 505 1. Falkowski, P. G., Fenchel, T. & Delong, E. F. The microbial engines that drive earth's  
506 biogeochemical cycles. *Science* **320**, 1034–1039 (2008).
- 507 2. McIlroy, S. J. *et al.* MiDAS 2.0: an ecosystem-specific taxonomy and online database for the  
508 organisms of wastewater treatment systems expanded for anaerobic digester groups. *Database* **2017**,  
509 1–9 (2017).
- 510 3. Huttenhower, C. *et al.* Structure, function and diversity of the healthy human microbiome. *Nature*  
511 **486**, 207–214 (2012).
- 512 4. Didelot, X., Walker, A. S., Peto, T. E., Crook, D. W. & Wilson, D. J. Within-host evolution of  
513 bacterial pathogens. *Nat. Rev. Microbiol.* **14**, 150–162 (2016).
- 514 5. Caporaso, J. G. *et al.* Ultra-high-throughput microbial community analysis on the Illumina HiSeq  
515 and MiSeq platforms. *ISME J.* **6**, 1621–1624 (2012).
- 516 6. Parks, D. H. *et al.* Recovery of nearly 8,000 metagenome-assembled genomes substantially expands  
517 the tree of life. *Nat. Microbiol.* **903**, 1–10 (2017).
- 518 7. Kirkegaard, R. H. *et al.* The impact of immigration on microbial community composition in full-  
519 scale anaerobic digesters. *Sci. Rep.* **7**, 9343 (2017).
- 520 8. Hugenholtz, P., Pitulle, C., Hershberger, K. L. & Pace, N. R. Novel division level bacterial diversity  
521 in a Yellowstone hot spring novel division level. *J. Bacteriol.* **180**, 366–376 (1998).
- 522 9. Eloë-Fadrosch, E. A. *et al.* Global metagenomic survey reveals a new bacterial candidate phylum in  
523 geothermal springs. *Nat. Commun.* **7**, 10476 (2016).
- 524 10. Solden, L., Lloyd, K. & Wrighton, K. The bright side of microbial dark matter: lessons learned from  
525 the uncultivated majority. *Curr. Opin. Microbiol.* **31**, 217–226 (2016).
- 526 11. Mukherjee, S. *et al.* 1,003 reference genomes of bacterial and archaeal isolates expand coverage of  
527 the tree of life. *Nat. Biotechnol.* **35**, 676–683 (2017).
- 528 12. Hu, P. *et al.* Genome-resolved metagenomic analysis reveals roles for candidate phyla and other  
529 microbial community members in biogeochemical transformations in oil reservoirs. *MBio* **7**, 1–12  
530 (2016).
- 531 13. Rinke, C. *et al.* Insights into the phylogeny and coding potential of microbial dark matter. *Nature*  
532 **499**, 431–437 (2013).
- 533 14. Albertsen, M. *et al.* Genome sequences of rare, uncultured bacteria obtained by differential coverage  
534 binning of multiple metagenomes. *Nat. Biotechnol.* **31**, 533–538 (2013).
- 535 15. Moitinho-Silva, L. *et al.* Integrated metabolism in sponge–microbe symbiosis revealed by genome-  
536 centered metatranscriptomics. *ISME J.* **11**, 1–16 (2017).
- 537 16. Dick, G. J. & Baker, B. J. Omic approaches in microbial ecology: charting the unknown. *Microbe* **8**,  
538 353–360 (2013).
- 539 17. Vanwonterghem, I., Jensen, P. D., Ho, D. P., Batstone, D. J. & Tyson, G. W. Linking microbial  
540 community structure, interactions and function in anaerobic digesters using new molecular  
541 techniques. *Curr. Opin. Biotechnol.* **27**, 55–64 (2014).
- 542 18. Kirkegaard, R. H. *et al.* Genomic insights into members of the candidate phylum Hyd24-12 common  
543 in mesophilic anaerobic digesters. *ISME J.* **10**, 1–13 (2016).
- 544 19. Nobu, M. K. *et al.* Phylogeny and physiology of candidate phylum ‘Atribacteria’ (OP9/JS1) inferred  
545 from cultivation-independent genomics. *ISME J.* **10**, 273–286 (2016).
- 546 20. McIlroy, S. J. *et al.* Genomic and in situ investigations of the novel uncultured Chloroflexi associated  
547 with 0092 morphotype filamentous bulking in activated sludge. *ISME J.* **10**, 2223–2234 (2016).

- 548 21. Takami, H. *et al.* A deeply branching thermophilic bacterium with an ancient Acetyl-CoA pathway  
549 dominates a subsurface ecosystem. *PLoS One* **7**, (2012).
- 550 22. Caporaso, J. G. *et al.* Global patterns of 16S rRNA diversity at a depth of millions of sequences per  
551 sample. *Proc. Natl. Acad. Sci.* **108**, 4516–4522 (2011).
- 552 23. Albertsen, M., Karst, S. M., Ziegler, A. S., Kirkegaard, R. H. & Nielsen, P. H. Back to basics - the  
553 influence of DNA extraction and primer choice on phylogenetic analysis of activated sludge  
554 communities. *PLoS One* **10**, e0132783 (2015).
- 555 24. Quast, C. *et al.* The SILVA ribosomal RNA gene database project: improved data processing and  
556 web-based tools. *Nucleic Acids Res.* **41**, 590–596 (2013).
- 557 25. Bolger, A. M., Lohse, M. & Usadel, B. Trimmomatic: a flexible trimmer for Illumina sequence data.  
558 *Bioinformatics* **30**, 2114–20 (2014).
- 559 26. Magoč, T. & Salzberg, S. L. FLASH: fast length adjustment of short reads to improve genome  
560 assemblies. *Bioinformatics* **27**, 2957–2963 (2011).
- 561 27. Edgar, R. C. Search and clustering orders of magnitude faster than BLAST. *Bioinformatics* **26**, 2460–  
562 2461 (2010).
- 563 28. Wang, Q., Garrity, G. M., Tiedje, J. M. & Cole, J. R. Naïve Bayesian classifier for rapid assignment  
564 of rRNA sequences into the new bacterial taxonomy. *Appl. Environ. Microbiol.* **73**, 5261–5267  
565 (2007).
- 566 29. R Core Team. R: a language and environment for statistical computing. *R Foundation for Statistical*  
567 *Computing, Vienna, Austria.* (2017). Available at: <http://www.r-project.org/>.
- 568 30. Wickham, H. ggplot2: elegant graphics for data analysis. *Springer-Verlag New York* (2009).  
569 Available at: <http://ggplot2.org>.
- 570 31. Boetzer, M. & Pirovano, W. SSPACE-LongRead: scaffolding bacterial draft genomes using long  
571 read sequence information. *BMC Bioinformatics* **15**, 1–9 (2014).
- 572 32. Boetzer, M. & Pirovano, W. Toward almost closed genomes with GapFiller. *Genome Biol.* **13**, R56  
573 (2012).
- 574 33. Vallenet, D. *et al.* MicroScope: a platform for microbial genome annotation and comparative  
575 genomics. *Database (Oxford)*. **2009**, bap021 (2009).
- 576 34. Vallenet, D. *et al.* MicroScope—an integrated microbial resource for the curation and comparative  
577 analysis of genomic and metabolic data. *Nucleic Acids Res.* **41**, D636–D647 (2013).
- 578 35. Ludwig, W. *et al.* ARB: a software environment for sequence data. *Nucleic Acids Res.* **32**, 1363–  
579 1371 (2004).
- 580 36. Yilmaz, L. S., Parnerkar, S. & Noguera, D. R. MathFISH, a web tool that uses thermodynamics-  
581 based mathematical models for in silico evaluation of oligonucleotide probes for fluorescence in situ  
582 hybridization. *Appl. Environ. Microbiol.* **77**, 1118–1122 (2011).
- 583 37. Cole, J. R. *et al.* Ribosomal Database Project: data and tools for high throughput rRNA analysis.  
584 *Nucleic Acids Res.* **42**, D633–42 (2014).
- 585 38. McIlroy, S. J., Tillett, D., Petrovski, S. & Seviour, R. J. Non-target sites with single nucleotide  
586 insertions or deletions are frequently found in 16S rRNA sequences and can lead to false positives in  
587 fluorescence in situ hybridization (FISH). *Env. Microbiol* **13**, 38–47 (2011).
- 588 39. Daims, H., Stoecker, K. & Wagner, M. Fluorescence in situ hybridization for the detection of  
589 prokaryotes. *Mol. Microb. Ecol.* **213**, 239 (2005).
- 590 40. Greuter, D., Loy, A., Horn, M. & Rattei, T. probeBase—an online resource for rRNA-targeted  
591 oligonucleotide probes and primers: new features 2016. *Nucleic Acids Res.* **44**, D586–D589 (2016).
- 592 41. Wallner, G., Amann, R. & Beisker, W. Optimizing fluorescent *in situ* hybridization with rRNA-

- 593 targeted oligonucleotide probes for flow cytometric identification of microorganisms. *Cytometry* **14**,  
594 136–143 (1993).
- 595 42. Nobu, M. K. *et al.* Microbial dark matter ecogenomics reveals complex synergistic networks in a  
596 methanogenic bioreactor. *ISME J.* **9**, 1710–1722 (2015).
- 597 43. Merhej, V., Royer-carezzi, M., Pontarotti, P. & Raoult, D. Massive comparative genomic analysis  
598 reveals convergent evolution of specialized bacteria. *Biol. Direct* **4**, I3 (2009).
- 599 44. Perkins, S. D., Scalfone, N. B. & Angenent, L. T. Comparative 16S rRNA gene surveys of granular  
600 sludge from three upflow anaerobic bioreactors treating purified terephthalic acid (PTA) wastewater.  
601 *Water Sci. Technol.* **64**, 1406–1412 (2011).
- 602 45. Kwon, S., Kim, T. S., Yu, G. H., Jung, J. H. & Park, H. D. Bacterial community composition and  
603 diversity of a full-scale integrated fixed-film activated sludge system as investigated by  
604 pyrosequencing. *J. Microbiol. Biotechnol.* **20**, 1717–1723 (2010).
- 605 46. Goux, X. *et al.* Microbial community dynamics in replicate anaerobic digesters exposed sequentially  
606 to increasing organic loading rate, acidosis, and process recovery. *Biotechnol. Biofuels* **8**, 122 (2015).
- 607 47. Chaganti, S. R., Lalman, J. A. & Heath, D. D. 16S rRNA gene based analysis of the microbial  
608 diversity and hydrogen production in three mixed anaerobic cultures. *Int. J. Hydrogen Energy* **37**,  
609 9002–9017 (2012).
- 610 48. Yarza, P. *et al.* Uniting the classification of cultured and uncultured bacteria and archaea using 16S  
611 rRNA gene sequences. *Nat. Rev. Microbiol.* **12**, 635–645 (2014).
- 612 49. Kysela, D. T., Randich, A. M., Caccamo, P. D. & Brun, Y. V. Diversity takes shape: understanding  
613 the mechanistic and adaptive basis of bacterial morphology. *PLoS Biol.* **14**, e1002565 (2016).
- 614 50. Porter, J. S. & Pate, J. L. Prosthecae of *Asticcacaulis biprosthecum*: system for the study of membrane  
615 transport. *J. Bacteriol.* **122**, 976–986 (1975).
- 616 51. Wagner, J. K., Setayeshgar, S., Sharon, L. A., Reilly, J. P. & Brun, Y. V. A nutrient uptake role for  
617 bacterial cell envelope extensions. *Proc. Nat. Acad. Sci. U. S. A.* **103**, 11772–11777 (2006).
- 618 52. McAdams, H. H. Bacterial stalks are nutrient-scavenging antennas. *Proc. Natl. Acad. Sci. U. S. A.*  
619 **103**, 11435–11436 (2006).
- 620 53. Woldemeskel, S. A. & Goley, E. D. Shapeshifting to survive: shape determination and regulation in  
621 *Caulobacter crescentus*. *Trends Microbiol.* **25**, 673–687 (2017).
- 622 54. Vasilyeva, L. V *et al.* *Asticcacaulis benevestitus* sp. nov., a psychrotolerant, dimorphic, prosthecae  
623 bacterium from tundra wetland soil. *Int. J. Syst. Evol. Microbiol.* **56**, 2083–2088 (2017).
- 624 55. Gonin, M., Quardokus, E. M., Donno, D. O. & Maddock, J. Regulation of stalk elongation by  
625 phosphate in *Caulobacter crescentus*. *J. Bacteriol.* **182**, 337–347 (2000).
- 626 56. Sutcliffe, I. C. A phylum level perspective on bacterial cell envelope architecture. *Trends Microbiol.*  
627 **18**, 464–470 (2010).
- 628 57. Huber, R. *et al.* *Thermotoga maritima* sp. nov. represents a new genus of unique extremely  
629 thermophilic eubacteria growing up to 90°C. *Arch. Microbiol.* **144**, 324–333 (1986).
- 630 58. Jiang, Y., Zhou, Q., Wu, K., Li, X. Q. & Shao, W. L. A highly efficient method for liquid and solid  
631 cultivation of the anaerobic hyperthermophilic eubacterium *Thermotoga maritima*. *FEMS Microbiol.*  
632 *Lett.* **259**, 254–259 (2006).
- 633 59. Imam, S., Chen, Z., Roos, D. S. & Pohlschröder, M. Identification of surprisingly diverse type IV  
634 pili, across a broad range of gram-positive bacteria. *PLoS One* **6**, e28919 (2011).
- 635 60. Stincone, A. *et al.* The return of metabolism: biochemistry and physiology of the pentose phosphate  
636 pathway. *Biol. Rev. Camb. Philos. Soc.* **90**, 927–963 (2014).
- 637 61. Wilson, W. A. *et al.* Regulation of glycogen metabolism in yeast and bacteria. *FEMS Microbiol. Rev.*

- 638           **34**, 952–985 (2010).
- 639   62.   Argüelles, J. C. Physiological roles of trehalose in bacteria and yeasts: a comparative analysis. *Arch.*  
640   *Microbiol.* **174**, 217–224 (2000).
- 641   63.   Rosenberg, E., DeLong, E. F., Lory, S., Stackebrandt, E. & Thompson, F. The Prokaryotes:  
642   prokaryotic physiology and biochemistry. (Springer-Verlag Berlin Heidelberg, 2013).  
643   doi:10.1007/978-3-642-30141-4
- 644   64.   Nobu, M. K., Narihiro, T., Kuroda, K., Mei, R. & Liu, W. T. Chasing the elusive Euryarchaeota class  
645   WSA2: genomes reveal a uniquely fastidious methyl-reducing methanogen. *ISME J.* **2**, 1–10 (2016).
- 646   65.   Adams, M. W. W. *et al.* Key role for sulfur in peptide metabolism and in regulation of three  
647   hydrogenases in the hyperthermophilic archaeon *Pyrococcus furiosus*. *J. Bacteriol.* **183**, 716–724  
648   (2001).
- 649   66.   Fukui, T. *et al.* Complete genome sequence of the hyperthermophilic archaeon *Thermococcus*  
650   *kodakaraensis* KOD1 and comparison with *Pyrococcus* genomes. *Genome Res.* **15**, 352–363 (2005).
- 651   67.   Brown, C. T. *et al.* Unusual biology across a group comprising more than 15% of domain Bacteria.  
652   *Nature* **523**, 208–211 (2015).
- 653   68.   Bravo, A. & Mora, J. Ammonium assimilation in *Rhizobium phaseoli* by the glutamine synthetase-  
654   glutamate synthase pathway. *J. Bacteriol.* **170**, 980–984 (1988).
- 655   69.   Buckel, W. & Thauer, R. K. Energy conservation via electron bifurcating ferredoxin reduction and  
656   proton/Na<sup>+</sup> translocating ferredoxin oxidation. *Biochim. Biophys. Acta - Bioenerg.* **1827**, 94–113  
657   (2013).
- 658   70.   Sapra, R., Bagramyan, K. & Adams, M. W. W. A simple energy-conserving system: proton reduction  
659   coupled to proton translocation. *Proc. Natl. Acad. Sci. U. S. A.* **100**, 7545–7550 (2003).
- 660   71.   Cassier-Chauvat, C., Veaudor, T. & Chauvat, F. Advances in the function and regulation of  
661   hydrogenase in the cyanobacterium *Synechocystis* PCC6803. *Int. J. Mol. Sci.* **15**, 19938–19951  
662   (2014).
- 663   72.   Eckert, C. *et al.* Genetic analysis of the Hox hydrogenase in the cyanobacterium *Synechocystis* sp.  
664   PCC 6803 reveals subunit roles in association, assembly, maturation, and function. *J. Biol. Chem.*  
665   **287**, 43502–43515 (2012).
- 666   73.   Fritsch, J., Lenz, O. & Friedrich, B. Structure, function and biosynthesis of O<sub>2</sub>-tolerant hydrogenases.  
667   *Nat. Rev. Microbiol.* **11**, 106–14 (2013).
- 668   74.   Luoto, H. H., Baykov, A. a, Lahti, R. & Malinen, A. M. Membrane-integral pyrophosphatase  
669   subfamily capable of translocating both Na<sup>+</sup> and H<sup>+</sup>. *Proc. Natl. Acad. Sci. U. S. A.* **110**, 1255–60  
670   (2013).
- 671   75.   Mayer, F. & Mu, V. Adaptations of anaerobic archaea to life under extreme energy limitation. *FEMS*  
672   *Microbiol. Rev.* **38**, 449–472 (2014).
- 673   76.   Nölling, J. *et al.* Genome sequence and comparative analysis of the solvent-producing bacterium  
674   *Clostridium acetobutylicum*. *J. Bacteriol.* **183**, 4823–4838 (2001).
- 675   77.   Shimizu, T. *et al.* Complete genome sequence of *Clostridium perfringens*, an anaerobic flesh-eater.  
676   *Proc. Natl. Acad. Sci. U. S. A.* **99**, 996–1001 (2002).
- 677   78.   Yan, N. Structural investigation of the proton-coupled secondary transporters. *Curr. Opin. Struct.*  
678   *Biol.* **23**, 483–491 (2013).
- 679   79.   Nobu, M. K. *et al.* The genome of *Syntrophorhabdus aromaticivorans* strain UI provides new  
680   insights for syntrophic aromatic compound metabolism and electron flow. *Environ. Microbiol.* **17**,  
681   4861–4872 (2015).
- 682   80.   Randich, A. M. & Brun, Y. V. Molecular mechanisms for the evolution of bacterial morphologies  
683   and growth modes. **6**, 1–13 (2015).

- 684 81. Whitman, W. B. Genome sequences as the type material for taxonomic descriptions of prokaryotes.  
685 *Syst. Appl. Microbiol.* **38**, 217–222 (2015).
- 686 82. Whitman, W. B. Modest proposals to expand the type material for naming of prokaryotes. *Int. J. Syst.*  
687 *Evol. Microbiol.* **66**, 2108–2112 (2016).
- 688 83. Parks, D. H., Imelfort, M., Skennerton, C. T., Hugenholtz, P. & Tyson, G. W. CheckM: assessing the  
689 quality of microbial genomes recovered from isolates, single cells, and metagenomes. *Genome Res.*  
690 **25**, 1043–55 (2015).
- 691
- 692

693 **Figures:**

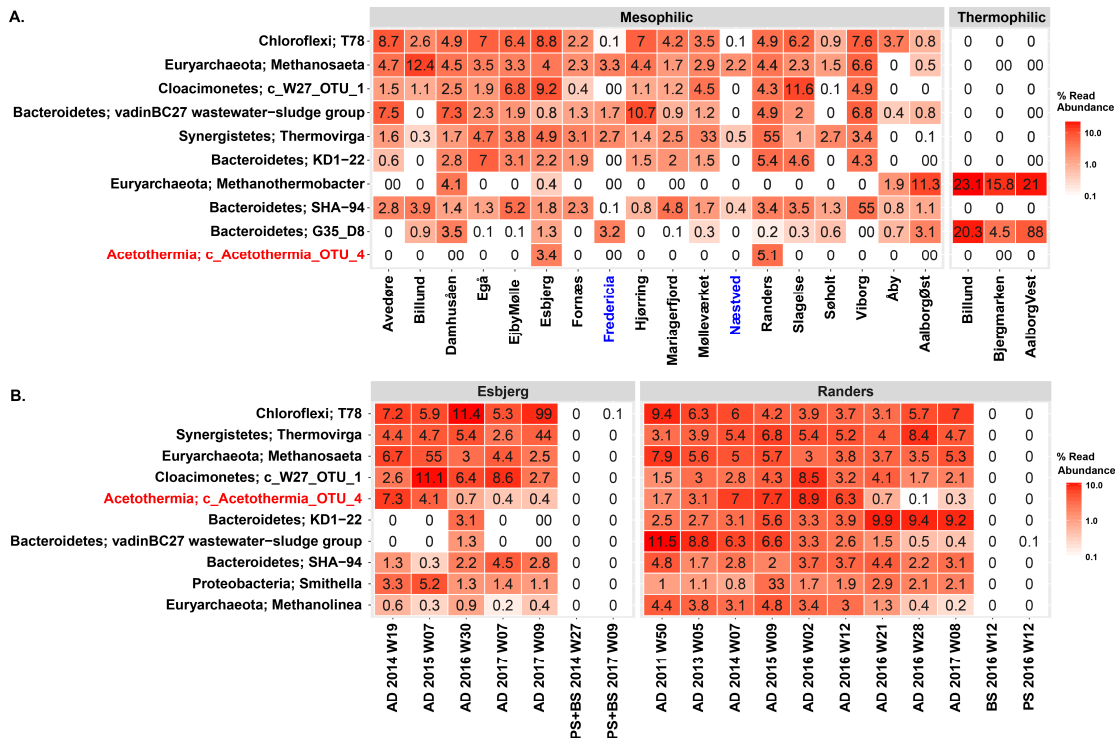

694

695 **Figure 1.** Heatmap of the ten most abundant microbial genera in anaerobic digesters  
 696 treating sewage sludge. (A) Average genera abundances of the period of 2011~2016 in the  
 697 digesters from 20 wastewater treatment plants (WWTPs). Labels at the bottom of the  
 698 heatmap represent the location of WWTPs and digesters. Blue labels represent WWTPs  
 699 applying thermal-hydrolysis process for pre-treating the feedstock. (B) Temporal analysis  
 700 of the microbiome composition in the digesters from Randers and Esbjerg WWTPs and of  
 701 the feedstock. Mean abundances of two digesters running in parallel at each WWTP were  
 702 shown in the profile. Labels at the bottom of the heatmap represent sample type, year, and  
 703 week of sampling time. Sample type includes: AD for sludge from anaerobic digesters; PS  
 704 for sludge from the primary clarifier, and BS for surplus biological sludge from secondary  
 705 clarifier; BS+PS for a mixture of PS and BS before being fed into the digester.  
 706 Classification levels presented are phylum and genus, which are separated by semicolon.  
 707 The genera are sorted by the mean abundance across all the analyzed samples.

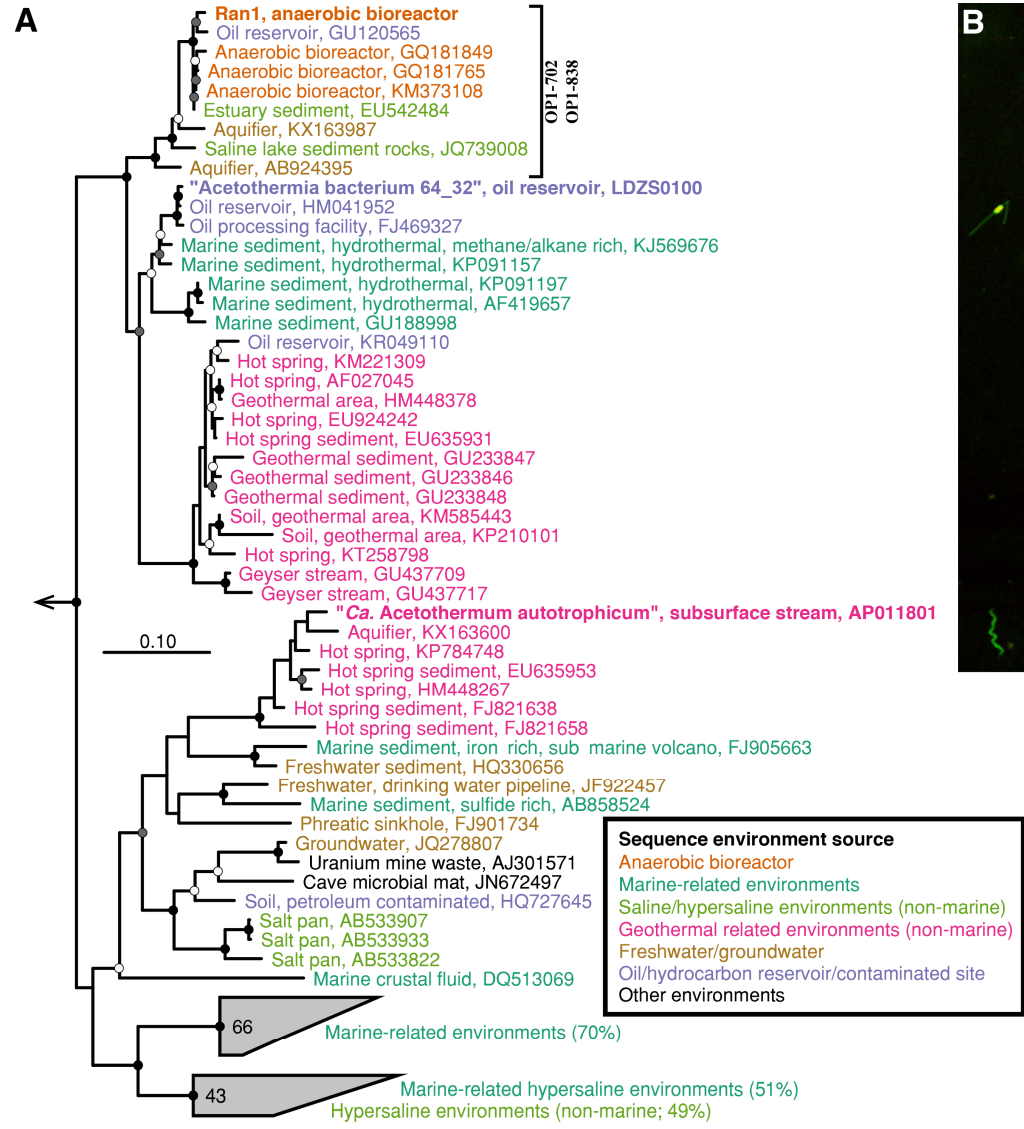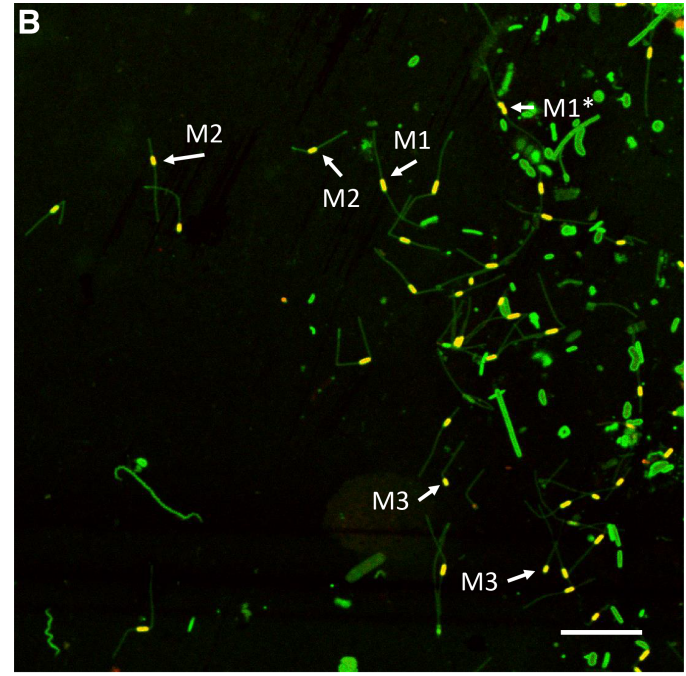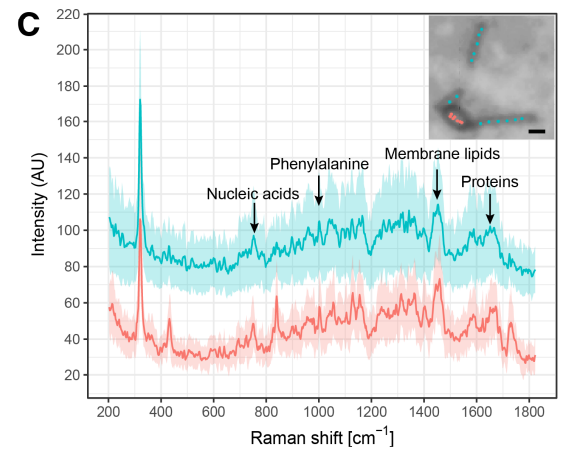

708

709 **Figure 2.** (A) Maximum-likelihood (PhyML) 16S rRNA gene phylogenetic tree of sequences classified to the candidate phylum  
710 Acetothermia (SILVA SSURef NR 99, Release 128). The alignment used for the tree applied a 20% conservational filter to remove  
711 hypervariable positions, giving 1120 aligned positions. Sequences are colored according to their isolation source environment. Proposed  
712 phylogenetic classification of the novel genus and coverage of the newly-designed FISH probes are indicated with a black bracket.  
713 Bootstrap values from 100 re-samplings are shown for branches with >50% (white dot), 50~70% (grey) and >90% (black) support.  
714 Species of the phylum Thermotogae were used as the outgroup. The scale bar represents substitutions per nucleotide base. An expanded  
715 version of the tree is provided in **Figure S4**. (B) Composite fluorescence micrograph of the Acetothermia cells, hybridized with the  
716 OP1-702 FISH probe (Cy3, red) and stained with Syto9 (green). Yellow signal indicates overlap of fluorescence from Cy3 and Syto9.  
717 Arrows indicate three slightly different morphologies: M1 = central rod with bipolar prosthecae of similar length; M2 = smaller central  
718 rod with bipolar prosthecae of different lengths; M3 = smallest central rod with a single polar prostheca. An M1 cell which seems to be  
719 undergoing cell division is indicated with an asterisk. PFA-fixed biomass samples were used, originating from an anaerobic sludge  
720 digester at Randers WWTP. Scale bar represents 10  $\mu\text{m}$ . (C) Raman spectra of a bipolar prosthecate cell targeted by OP1-702 probe.  
721 Seven spectra for the main rod body (red) and thirteen for the prosthecae (cyan) were obtained as indicated by the spots on the embedded  
722 cell image. Average spectra of the rod and prosthecae, respectively, are shown with the standard deviation depicted as ribbons. Peaks  
723 were assigned for nucleic acids ( $784\text{ cm}^{-1}$ ), phenylalanine ( $1004\text{ cm}^{-1}$ ), membrane lipids ( $1450\text{ cm}^{-1}$ ), and amide I linkages of proteins  
724 ( $1660\text{ cm}^{-1}$ )<sup>80,81</sup>.



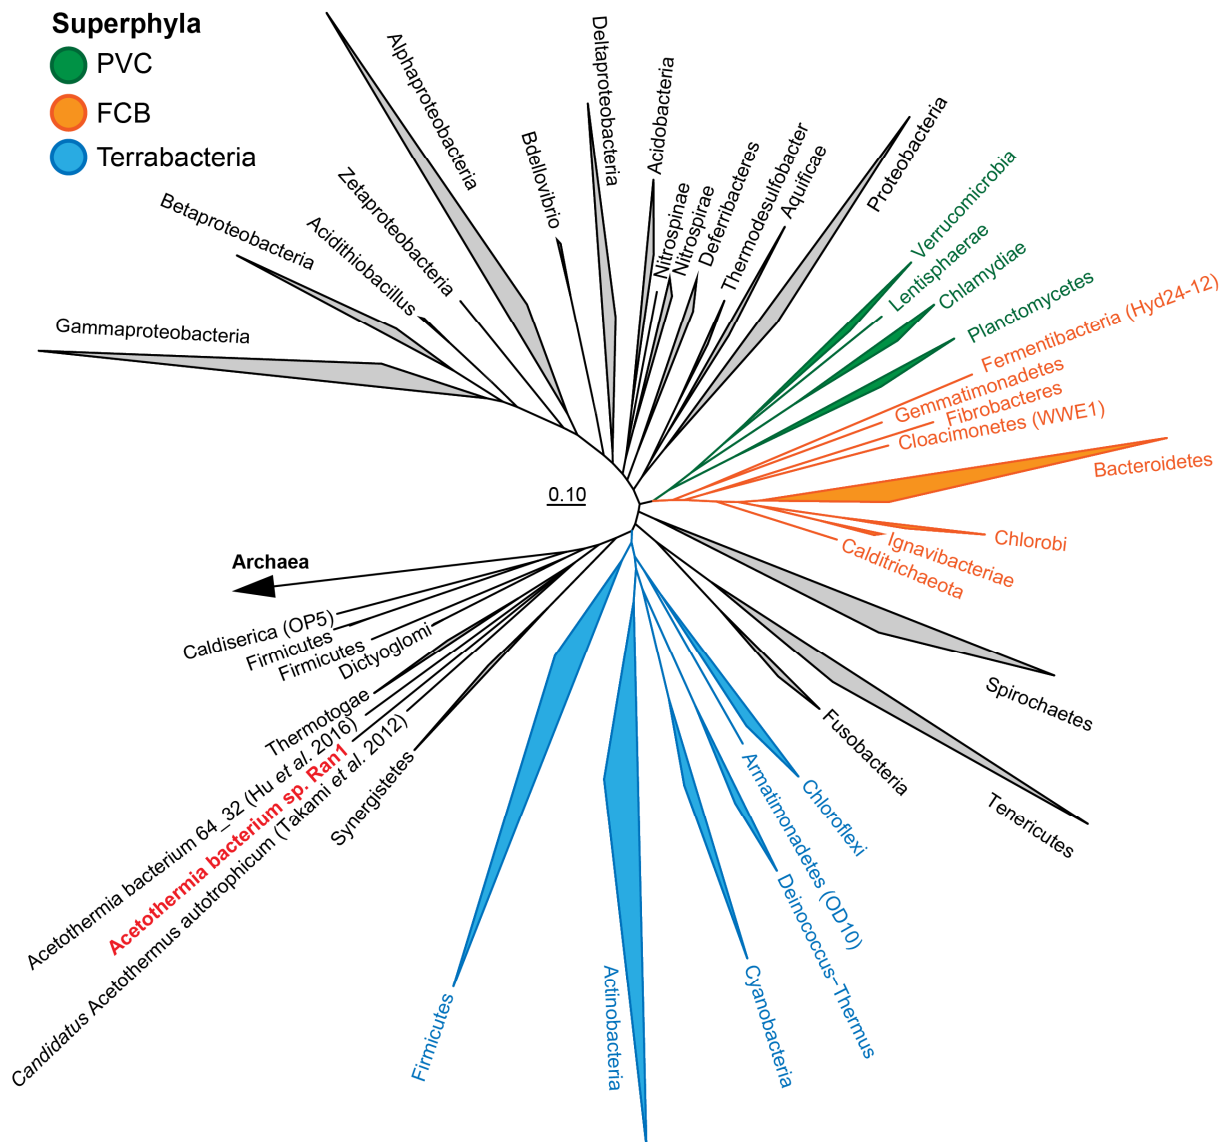

725

726 **Figure 3.** Phylogenetic position of *Acetothermia* genomes in the reference genome tree generated  
 727 by CheckM v. 1.0.6<sup>83</sup> and visualized in ARB v. 6.0.2<sup>35</sup>. The CheckM tree is inferred from the  
 728 concatenation of 43 conserved marker genes and incorporates 2052 finished and 3605 draft  
 729 genomes from the IMG database<sup>83</sup>.

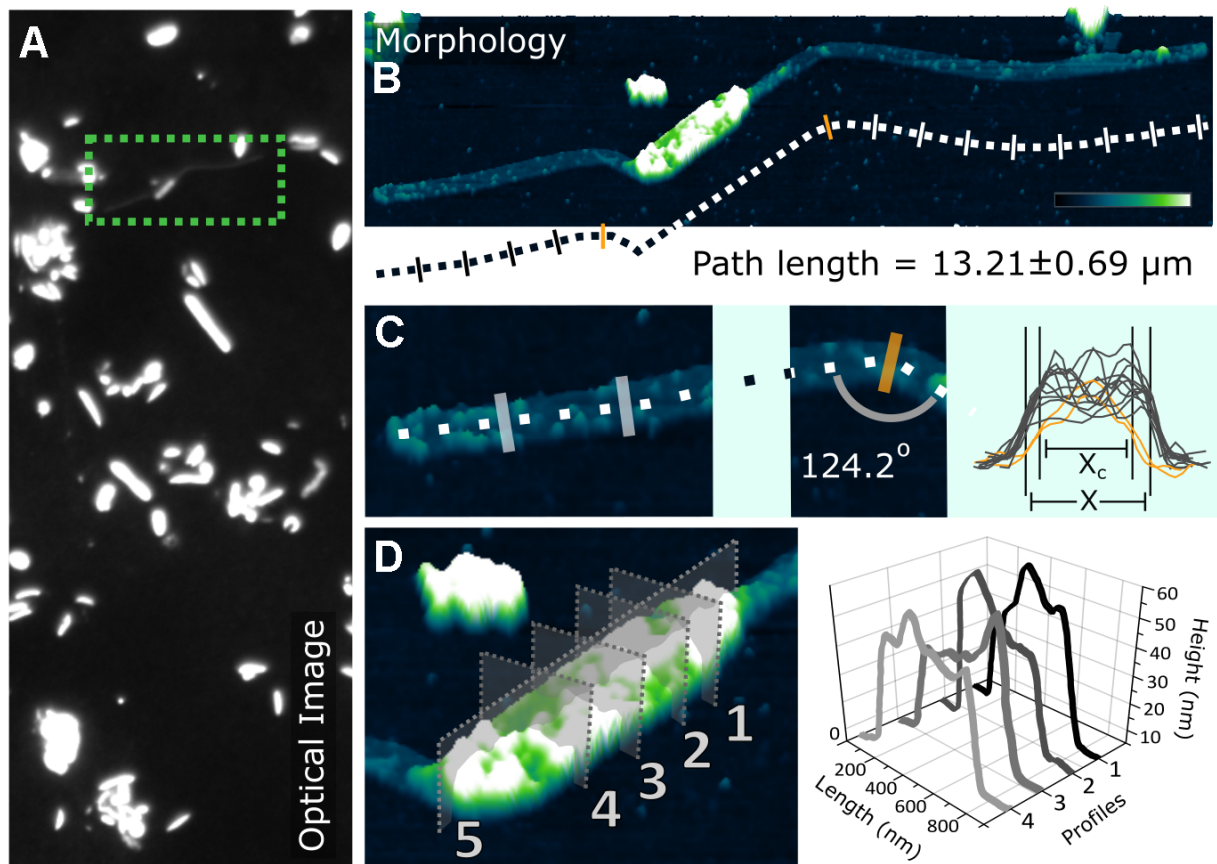

730

731 **Figure 4.** Combined optical and atomic force microscopy images reveal the morphology of Ran1  
732 cells. (A) The optical image to the left shows a broad overview of the sample which is composed  
733 of bacteria of different shapes; (B) The morphology image presents the 3D form of a Ran1 cell in  
734 real space. The scale bar is  $2 \mu\text{m}$  in length, and the color transition represents the height change  
735 from 0 to 39 nm. (C) The cell stretches out to  $13.21 \pm 0.6 \mu\text{m}$  with prosthecae at both poles, which  
736 are  $0.26053 \pm 0.00911 \mu\text{m}$  ( $X$ ) in width, except for slight narrowing down to  $0.22465 \pm 0.00115 \mu\text{m}$   
737 ( $X_c$ ) due to bending with angles of up to  $124.2 \pm 3.6^\circ$ ; (D) Zoom in the image of the main rod body.  
738 Cross sections show a rugged surface, as depicted and measured by Profile 1-4 perpendicular to  
739 the length of the rod represented by Profile 5.

Manuscript draft for Nature Microbiology

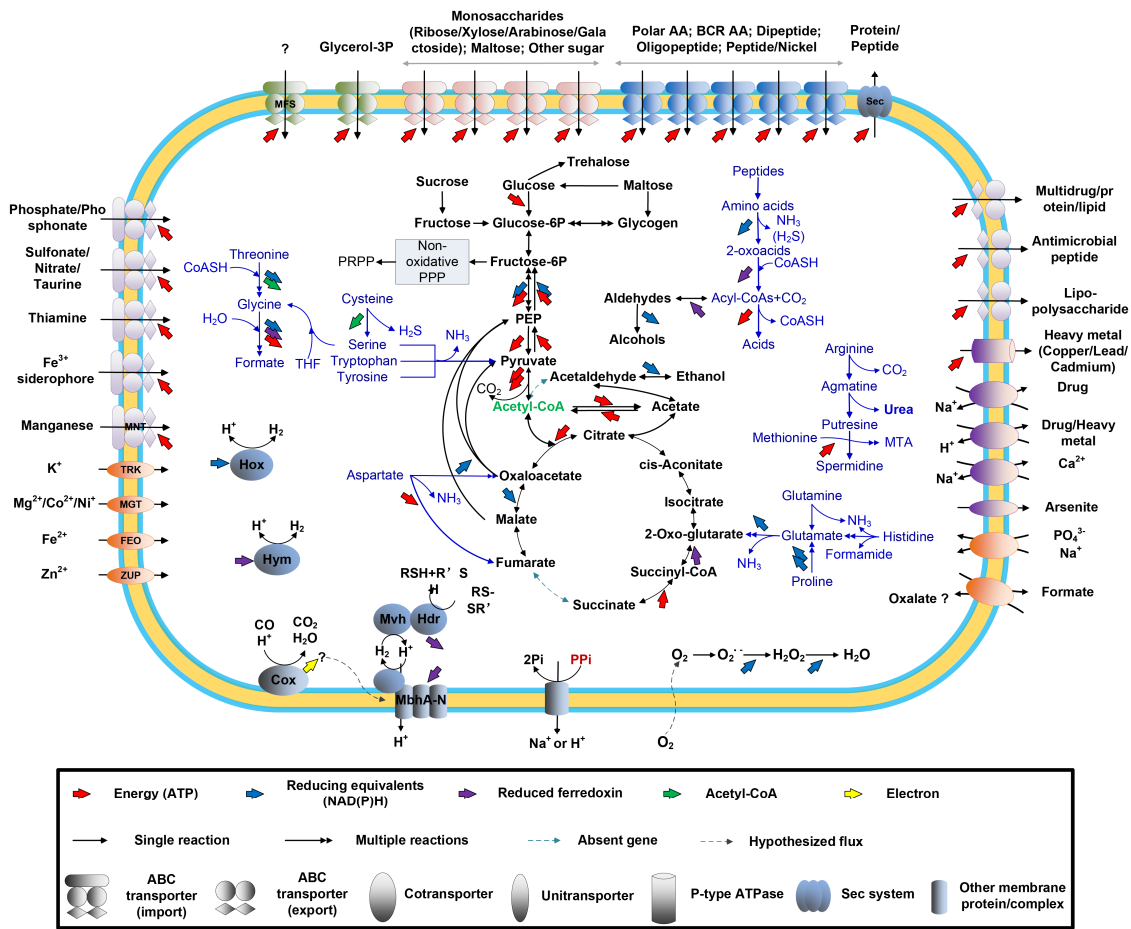

741 **Figure 5.** Metabolic model of *Acetothermia* sp. Ran1 based on the annotated genome  
 742 sequences (**Table S6**). AA = Amino acids; BRC AA = Branched-chain amino acids; Sec =  
 743 Secretion system; Glycerol-3P = Glycerol-3-phosphate; PPP = Pentose phosphate  
 744 pathway; PRPP = 5-Phospho-alpha-D-ribose-1-diphosphate; ATP = Adenosine  
 745 triphosphate; CoA = Coenzyme A; THF = Tetrahydrofolate; NAD(P)H = Nicotinamide  
 746 adenine dinucleotide (phosphate) hydrogen; Pi = Phosphate; PPi = Pyrophosphate; MTA  
 747 = 5'-S-Methyl-5'-thioadenosine; MNT = Manganese transporter; TRK = Potassium (K)  
 748 transporter; MGT= Magnesium transporter; FED = Ferrous iron ( $Fe^{2+}$ ) transporter; ZUP  
 749 = Zinc (Zn) transporter; MFS = Major facilitator superfamily transporter. More details on  
 750 amino acids and electron transport metabolisms are shown in **Figure S10-12**.
